# Supplementary material
Source: ML conference proceedings conference paper supplement (https://proceedings.neurips.cc/paper_files/paper/2015/hash/e0ab531ec312161511493b002f9be2ee-Abstract.html)
Supplement: Supplementary file [file e0ab531ec312161511493b002f9be2ee-Supplemental.zip]

---

# Supplemental Materials: Rate-Agnostic (Causal) Structure Learning

---

**Sergey Plis**

The Mind Research Network,  
Albuquerque, NM  
s.m.plis@gmail.com

**David Danks**

Carnegie-Mellon University  
Pittsburgh, PA  
ddanks@cmu.edu

**Cynthia Freeman**

The Mind Research Network,  
CS Dept., University of New Mexico  
Albuquerque, NM  
cynthiaw2004@gmail.com

**Vince Calhoun**

The Mind Research Network  
ECE Dept., University of New Mexico  
Albuquerque, NM  
vcalhoun@mrn.org

## Abstract

Supplemental materials for Rate-Agnostic (Causal) Structure Learning.

## 1 Convergence

**Definition** Frobenius number is the largest integer unrepresentable by an integer weighted combination of a set of integers (denoted here as  $n_F$ ).

**Definition** Graph diameter the length of the “longest shortest path” between any two graph nodes.

**Definition** Transient number is the length of the “longest shortest path” from a node that touches all simple loops of the SCC. We denote this path as  $\tau$  and  $length(\tau) = \gamma$ .

In other words,  $\gamma$  can be defined operationally as follows (see Figure 1):

1. for each node in the SCC find the shortest path that goes through the SCC and touches enough simple loops to make their gcd=1 and their Frobenius number  $\leq n_F$  of the whole SCC (passing through just one node of a simple loop is enough);
2. choose the path of the maximum length out of these  $n$  (number of nodes) shortest paths;
3. the length of this path is  $\gamma$

**Theorem 3.1.** *If  $\gcd(\mathcal{L}_S) = 1$ , then stabilization occurs at  $f \leq n_F + \gamma + d + 1$ .*<sup>1</sup>

*Proof.* Consider arbitrary nodes  $X, Y$ . Let  $\tau_X$  be the “transient path” for  $X$ . By definition of Frobenius number and the fact that  $length(\tau_X) \leq length(\tau) = \gamma$ , we have that  $\forall l \geq (n_F + \gamma) \exists \pi[\pi : X \rightarrow \dots \rightarrow X \ \& \ length(\pi) = l]$ . Let  $\sigma$  be the shortest path from  $X$  to  $Y$ . Clearly,  $length(\sigma) \leq d$ . Thus,  $\forall l \geq (n_F + \gamma + d) \exists \rho[\rho = \pi \circ \sigma \ \& \ length(\rho) = l]$ . Thus, for those  $l$ , there is a path from arbitrary  $X$  to arbitrary  $Y$ . Because bidirected edges appear only for  $u > k$  where  $k$  is the length of the balanced paths, we must add 1 to ensure full convergence.  $\square$

**Theorem 3.2.** *If  $\mathcal{G}^u = \mathcal{G}^v$  for  $u > v$ , then  $\forall w > u \exists k_w < u[\mathcal{G}^w = \mathcal{G}^{k_w}]$ .*

---

<sup>1</sup>All proofs are found in the supplement for clarity of exposition



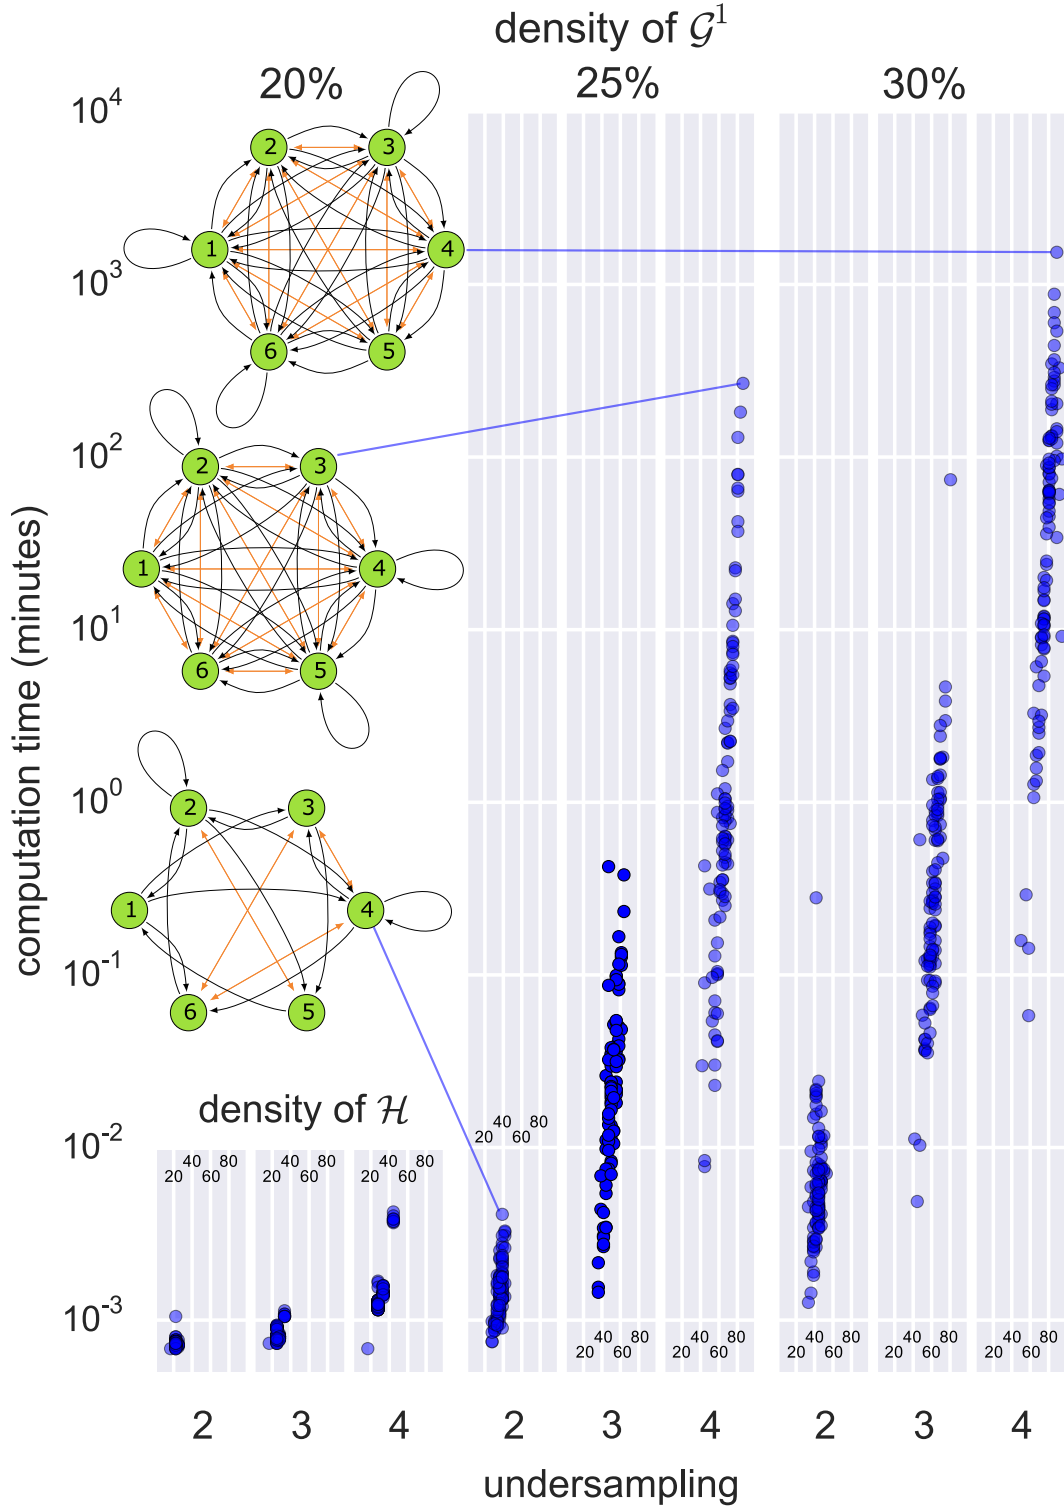

Figure 4: Enlarged version of Figure 4 in the main text.

**Lemma 3.8.** *If  $u > 1$ , then  $\forall V \not\rightarrow W \in \mathcal{H} \nexists T[V \leftarrow T \rightarrow W] \in \mathcal{G}^1$*

*Proof.* Proof follows immediately from persistence of bidirected edges in undersampling.  $\square$
